# Supplementary material
Source: publisher site journal article supplement (https://www.dovepress.com/article/406835)
Supplement: Supplementary file 1 [file get_supplementary_file.php]

**Supplementary description**

**Table S1:** **Basic clinicopathological features of patients included in IHC**

| (IHC) | Age | Gender | Pathology | Vascular/Nerve invasion |
| --- | --- | --- | --- | --- |
| sample1 | 52 | Female | Nonspecific invasion carcinoma | (-)/(-) |
| sample2 | 40 | Female | Nonspecific invasion carcinoma | (+)/(-) |
| sample3 | 59 | Female | Nonspecific invasion carcinoma | (-)/(-) |
| sample4 | 55 | Female | Nonspecific invasion carcinoma | (-)/(-) |
| sample5 | 55 | Female | Nonspecific invasion carcinoma | (+)/(-) |
| sample6 | 68 | Female | Nonspecific invasion carcinoma | (+)/(-) |

**Figure S1:**

**
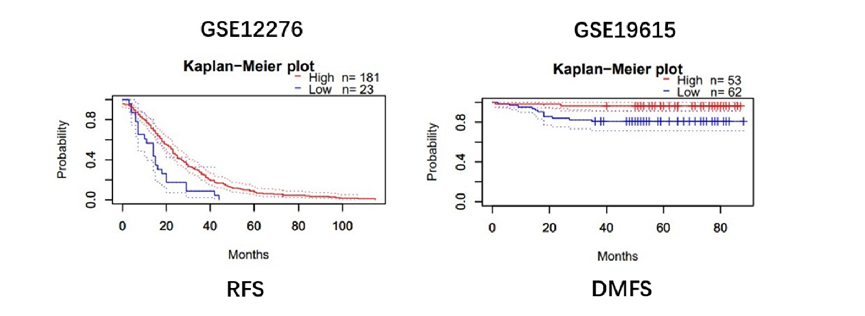
**

Relationship between CES2, RFS, and DMFS in the PrognoScan database.

**Figure S2:**

**
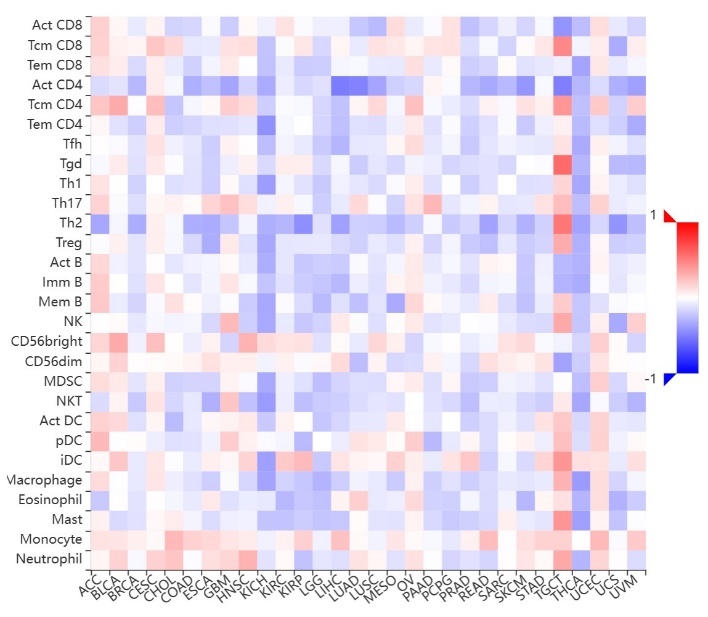
**

Correlations between the abundance of tumor-infiltrating lymphocytes (TILs) and CES2 in the TISIDB database.
